# Supplementary material
Source: Elsevier journal article supplement (https://www.sciencedirect.com/science/article/pii/S0025775322000549)
Supplement: mmc1 [file S0025775322000549:mmc1.doc]

# MATERIAL Y MÉTODOS

## Diseño del estudio

Se llevó a cabo un estudio retrospectivo, observacional y multicéntrico de ámbito nacional de pacientes hospitalizados por COVID-19 desde el 1 de marzo al 1 de octubre de 2020. Los datos fueron obtenidos del Registro SEMI-COVID-19 de la Sociedad Española de Medicina Interna (SEMI) en el que participan 150 hospitales españoles. En el registro SEMI-COVID-19 se han incluido de forma consecutiva pacientes mayores de edad con enfermedad por COVID-19 confirmada microbiológicamente mediante una prueba de transcripción reversa de la reacción en cadena de polimerasa (RT-PCR) obtenido mediante una muestra nasofaríngea, de esputo o de lavado broncoalveolar.

Para este estudio, hemos seleccionado los pacientes con antecedentes de FA durante el ingreso hospitalario por COVID-19.

## Variables

Se analizaron variables clínicas, epidemiológicas, radiológicas, de laboratorio y terapéuticas, así como de mortalidad durante el ingreso o reingreso precoz, definido éste como un nuevo episodio de ingreso hospitalario dentro de los 30 días tras el alta. Los datos fueron recogidos retrospectivamente usando un sistema de captura de datos on-line. La carga de comorbilidad de los pacientes fue establecida con el índice de comorbilidad de Charlson ajustado a la edad [[1]](#endnote-1). Para establecer el estado funcional previo al ingreso hospitalario se utilizó el índice de Barthel [[2]](#endnote-2)(independiente o dependencia leve: 100-91; dependencia moderada: 90-61; dependencia severa: ≤60). Se consideró que los pacientes padecían hipertensión arterial, diabetes mellitus o dislipemia si tenían un diagnóstico previo de las mismas entre sus antecedentes médicos o se encontraban recibiendo tratamiento médico para ellas. La diabetes mellitus se clasificó en 2 subgrupos: con lesión de órgano diana (afectación cerebral, cardíaca, renal o de retina) o sin lesión de órgano diana. La enfermedad pulmonar crónica fue definida como un diagnóstico previo de enfermedad pulmonar obstructiva crónica y/o asma. La enfermedad cardiovascular arterioesclerótica se definió por una historia previa de cardiopatía isquémica (infarto agudo de miocardio, síndrome coronario agudo, angina o revascularización coronaria). La enfermedad neoplásica incluyó todos aquellos tumores sólidos no metastásicos (excluyendo tumores de piel no-melanoma). La enfermedad renal moderada-severa se definió por un filtrado glomerular <45 ml/minuto/1.73m2 de acuerdo con la ecuación CKD-EPI (10). La hepatopatía moderada-severa se definió como un grado B o C en la clasificación de Child-Pugh. La obesidad fue definida por un índice de masa corporal ≥30 kg/m2. Las comorbilidades fueron recogidas de la historia clínica de cada hospital. Los datos de laboratorio (hemograma, bioquímica, gasometría, coagulación) y pruebas de imagen se recogieron al ingreso. En cuanto a la anticoagulación, el tratamiento anticoagulante basal se clasificó en AVK y ACOD, ya que la frecuencia de HBPM fue despreciable. Sin embargo, en el tratamiento anticoagulante durante el ingreso, sí se diferenciaron tres grupos: AVK, ACOD y HBPM. Las complicaciones intrahospitalarias incluyeron: ingreso en unidad de cuidados intensivos (UCI), presencia de síndrome de distrés respiratorio agudo (SDRA), síndrome coronario agudo, arritmia, shock, sepsis, insuficiencia renal aguda, tromboembolismo venoso e isquemia arterial aguda. El soporte ventilatorio incluyó ventilación mecánica invasiva, no invasiva y alto flujo de oxígeno.

## Análisis estadístico

Los pacientes fueron divididos según la variable categórica de mortalidad en fallecidos o no-fallecidos. Las variables categóricas y continuas fueron expresadas como valores absolutos y porcentajes y como medianas (rangos), respectivamente. Las diferencias entre grupos se analizaron mediante la prueba t de Student o la U de Mann-Whitney para variables continuas o la Chi cuadrado de Pearson para las variables categóricas. Un valor de p<0,05 fue considerado estadísticamente significativo. La medida de asociación fue presentada como el odds ratio (OR) con un intervalo de confianza del 95% (IC 95%). Posteriormente, se realizó un análisis multivariante expresado como odds ratio ajustada(ORA), IC 95%. El análisis de regresión logística fue usado para identificar factores independientes al ingreso para la mortalidad intrahospitalaria, incluyéndose aquellas variables con significación estadística en el análisis bivariante y con un porcentaje de valores perdidos inferior al 20%. El análisis estadístico fue realizado con el programa informático SPSS versión 26.0 (IBM SPSS Statistics ©).

## Aspectos éticos

Todos los pacientes dieron su consentimiento informado. Este estudio fue llevado a cabo según la Declaración de Helsinki y fue aprobado por los Comité de Ética de Málaga (Código: SEMI-COVID-19 27-03-20). Se siguió la iniciativa STROBE para la publicación de estudios observacionales (disponible en [www.strobe-statement.org](http://www.strobe-statement.org)).

1. Charlson ME, Feinstein AR. A new clinical index of growth rate in the staging of breast cancer. Am J Med. 1980;69(4):527-36 [↑](#endnote-ref-1)
2. MAHONEY FI, BARTHEL DW. FUNCTIONAL EVALUATION: THE BARTHEL INDEX. Md State Med J. 1965 ;14:61-5. [↑](#endnote-ref-2)
